# Supplementary material
Source: Springer Nature journal article supplement (https://www.springermedizin.de/resource/supplementary/12245_2012_120_MOESM2_ESM.pdf/9672812)

# Association between GRADE Familiarity and usefulness

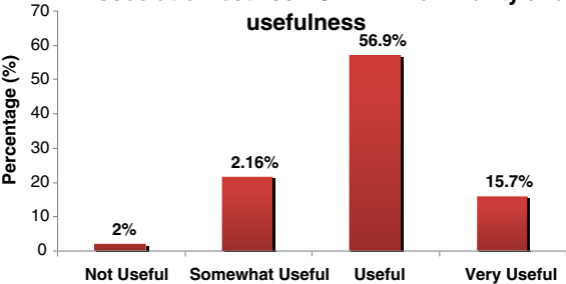

Supplement: MOESM2 [file 9672812]
